# Supplementary material for: Band and microstructure engineering toward high thermoelectric performance in SnTe
Source: Royal Society of Chemistry journal article supplement (doi:10.1039/d4ta03729d), 2024-01-01
Supplement: d4ta03729d1.pdf [file d4ta03729d1.pdf]

## Supporting Information

### Band and microstructure engineering toward high thermoelectric performance in SnTe

Jingli Xu<sup>1</sup>, Zizhen Zhou<sup>1,\*</sup>, Kaiqi Zhang<sup>1</sup>, Ting Zhao<sup>1</sup>, Yiqing Wei<sup>2</sup>, Bin Zhang<sup>3</sup>,  
Honghui Wang<sup>1,\*</sup>, Xu Lu<sup>1,\*</sup> and Xiaoyuan Zhou<sup>1,3</sup>

<sup>1</sup> Chongqing Key Laboratory of Interface Physics in Energy Conversion and College of Physics, Chongqing University, Chongqing 401331, P. R. China

<sup>2</sup> College of Physics and Electronic Engineering, Chongqing Normal university, Chongqing 401331, P. R. China

<sup>3</sup> Analytical and Testing Center, Chongqing University, Chongqing 401331, P. R. China

\*Corresponding authors: [zzzhou@cqu.edu.cn](mailto:zzzhou@cqu.edu.cn), [wanghh@cqu.edu.cn](mailto:wanghh@cqu.edu.cn) and [luxu@cqu.edu.cn](mailto:luxu@cqu.edu.cn)

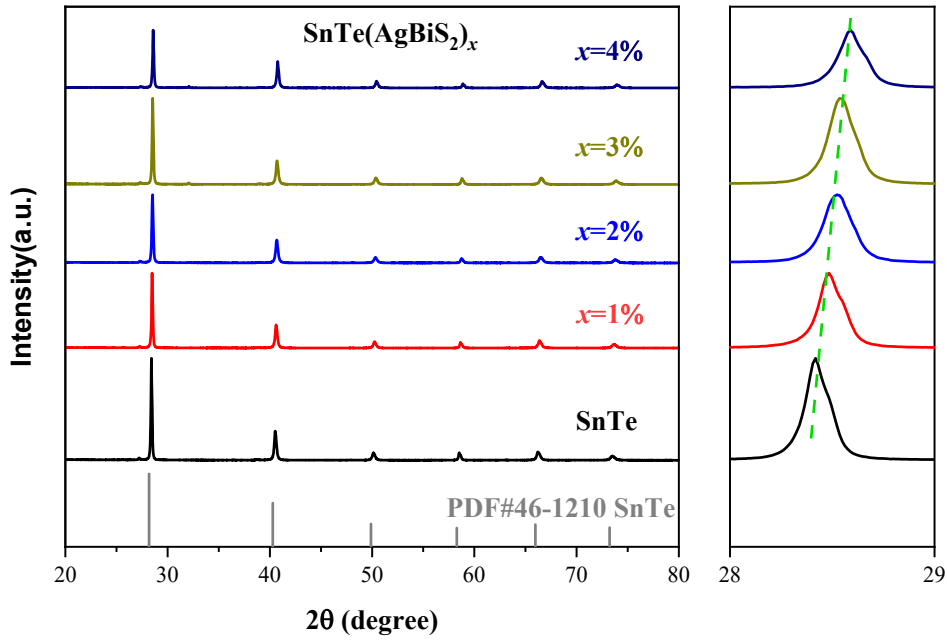

Figure S1 Powder XRD patterns and Enlargement of the powder XRD patterns at 28°~ 29° for all  $\text{SnTe}(\text{AgBiS}_2)_x$  ( $x = 1\%$ ,  $2\%$ ,  $3\%$ , and  $4\%$ ) samples.

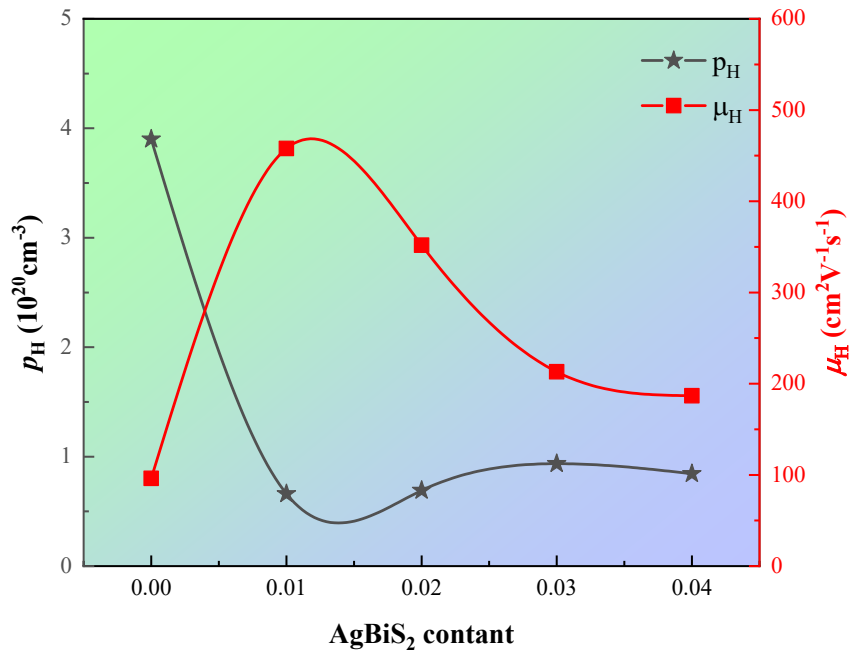

Figure S2 The relationship between Hall carrier concentration and Hall mobility with alloying  $\text{AgBiS}_2$  content.

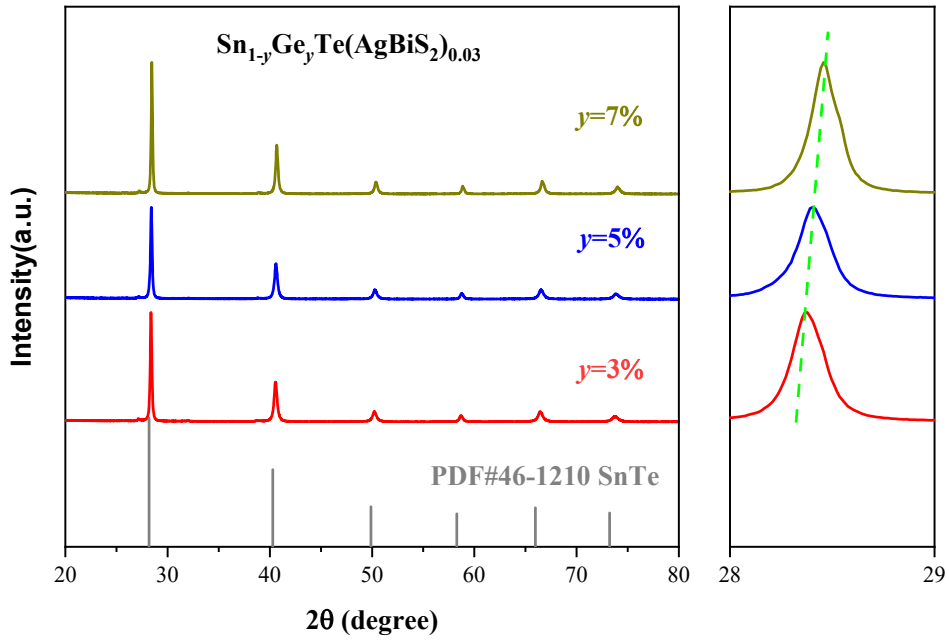

Figure S3 Powder XRD patterns and Enlargement of the powder XRD patterns at  $28^\circ \sim 29^\circ$  for all  $\text{Sn}_{1-y}\text{Ge}_y\text{Te}(\text{AgBiS}_2)_{0.03}$  ( $y = 3\%$ ,  $5\%$ , and  $7\%$ ) samples.

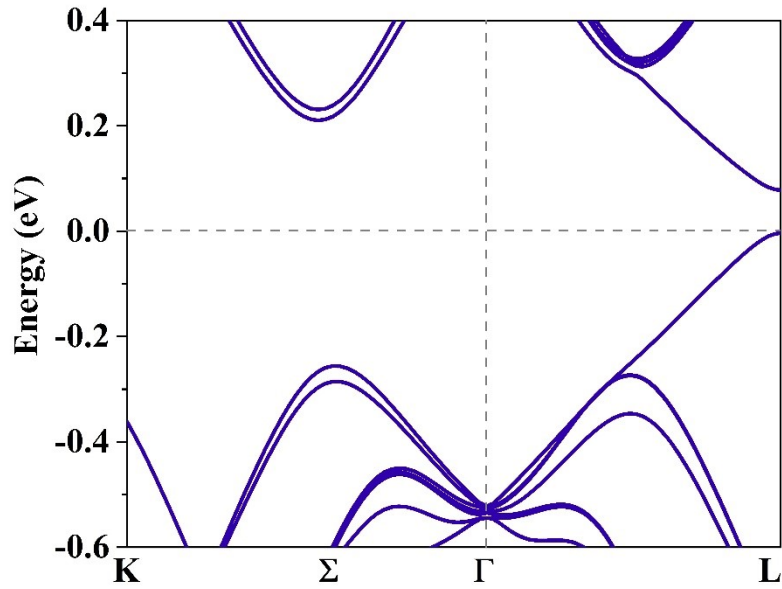

Figure S4 Band structures of Ge doped SnTe.

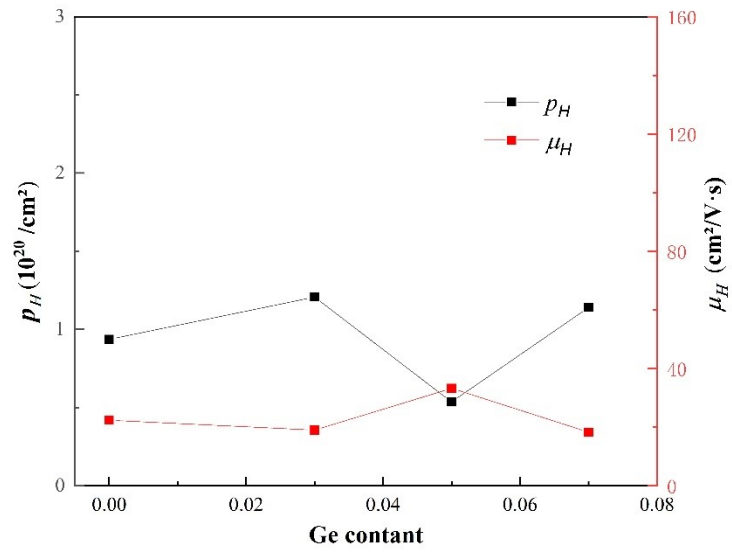

Figure S5 The relationship between Hall carrier concentration and Hall mobility with Ge doping content.

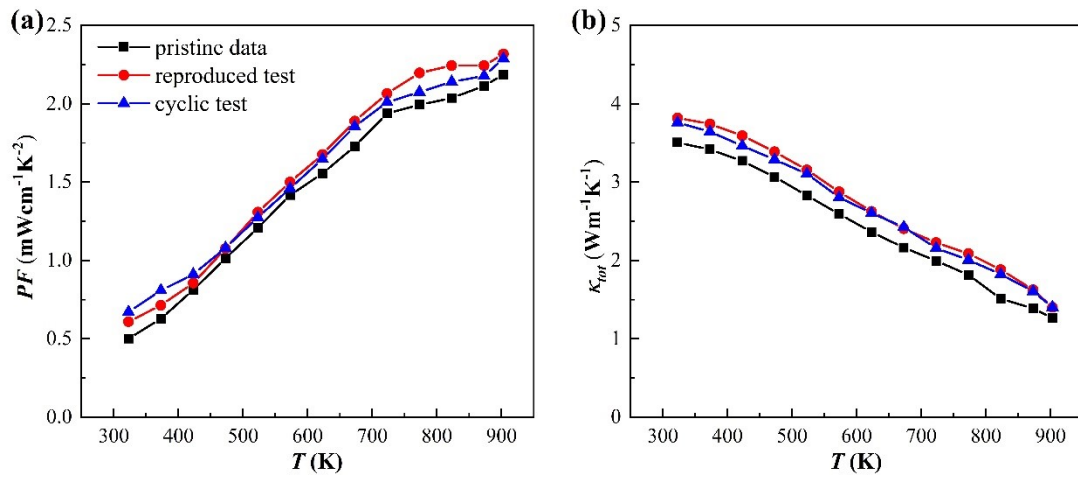

Figure S6 The cycling stability and measurement repeatability tests for the sample with the highest  $zT$  values.

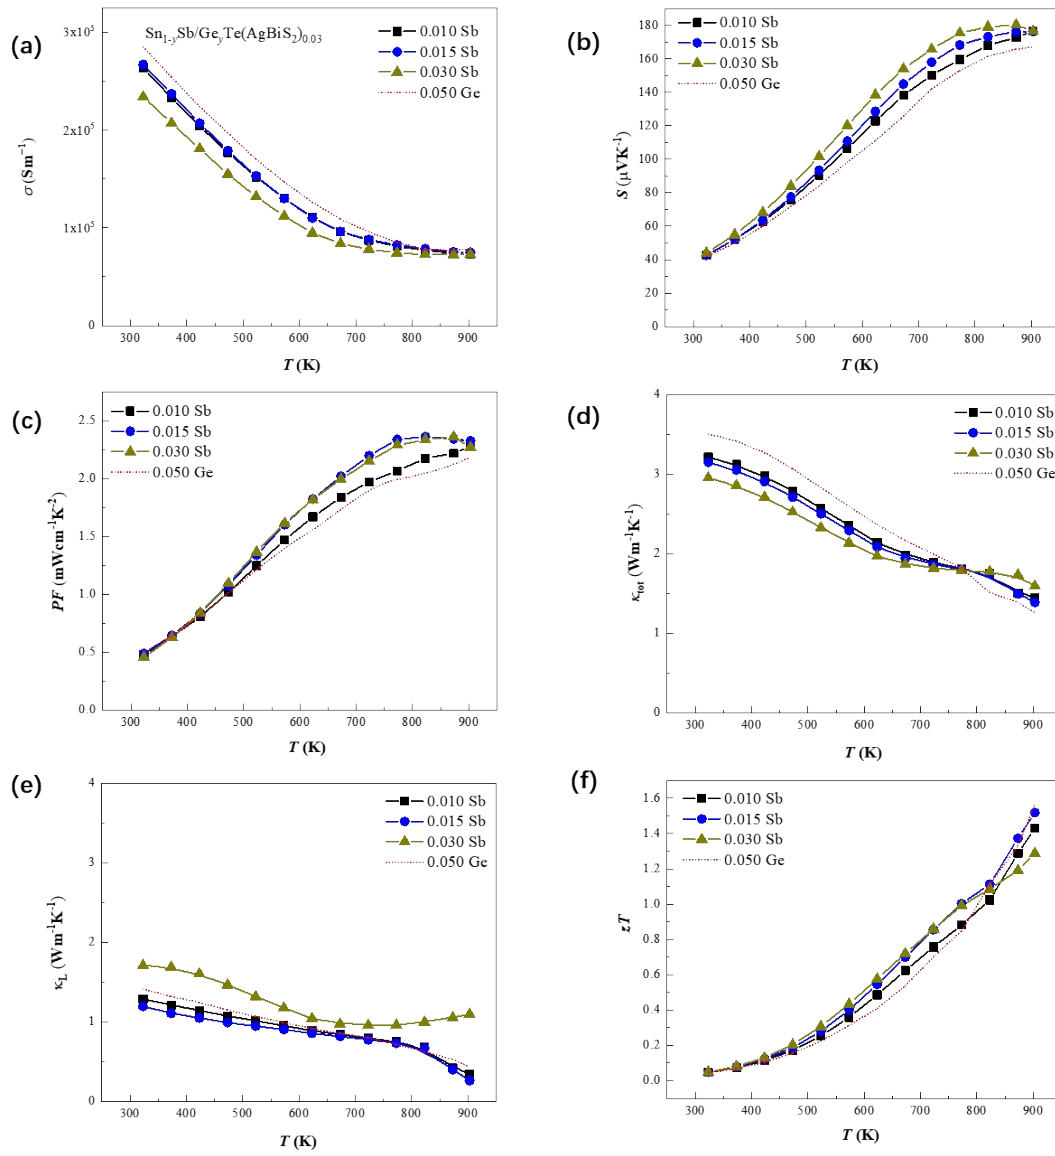

Figure S7 Temperature dependence of (a) electrical conductivity, (b) Seebeck coefficient, (c) power factor, (d) thermal conductivity, (e) lattice thermal conductivity, and (f)  $zT$  values of  $\text{Sn}_{1-y}\text{Sb}/\text{Ge}_y\text{Te}+0.03\text{AgBiS}_2$  samples.
